# Supplementary material for: In vitro anticancer and antibacterial potentials of selected medicinal plants and isolation and characterization of a natural compound from Withania coagulans
Source: publisher site journal article supplement (doi:10.1515/znc-2021-0259), 2021-12-13
Supplement: Supplementary file 1 [file j_znc-2021-0259_suppl.docx]

***In vitro* anticancer and antibacterial potentials of selected medicinal plants and isolation and characterization of a natural compound from *Withania coagulans***

**Bassam Oud Aljohny1, Yasir Anwar1, Shahid Ali Khan2***

*1Department of Biological Sciences, Faculty of Science, King Abdulaziz University Jeddah, Kingdom of Saudi Arabia* 1[yasirpcsir2006@gmail.com](mailto:yasirpcsir2006@gmail.com) 1[boaljohny@kau.edu.sa](mailto:boaljohny@kau.edu.sa)

*2Department of Chemistry, University of Swabi, Anbar 23561, Khyber Pakhtunkhwa, Pakistan 2*[shahidsawal007@gmail.com](mailto:shahidsawal007@gmail.com)

**Corresponding author Dr. Shahid Ali Khan***

Email: [shahidsawal007@gmail.com](mailto:shahidsawal007@gmail.com) Contact detail: 00923334246635

ORCID: 0000-0003-0132-8000


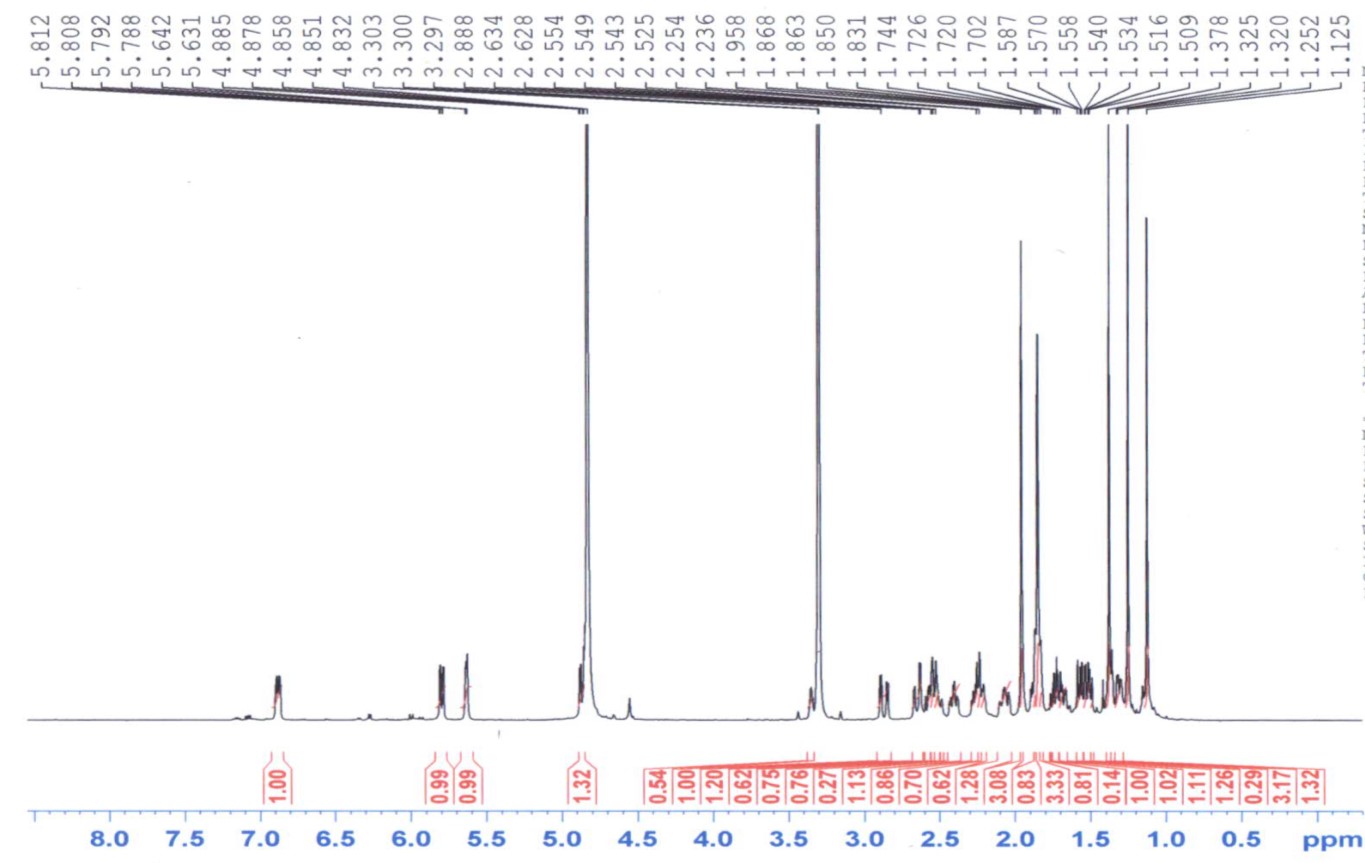


**Figure-S1**: 1H-NMR spectrum of the isolated compound recorded in CD3OD at 500 MHz.

**Figure-S2**: Broad Band NMR spectrum of the isolated compound recorded in CD3OD at 500 MHz.


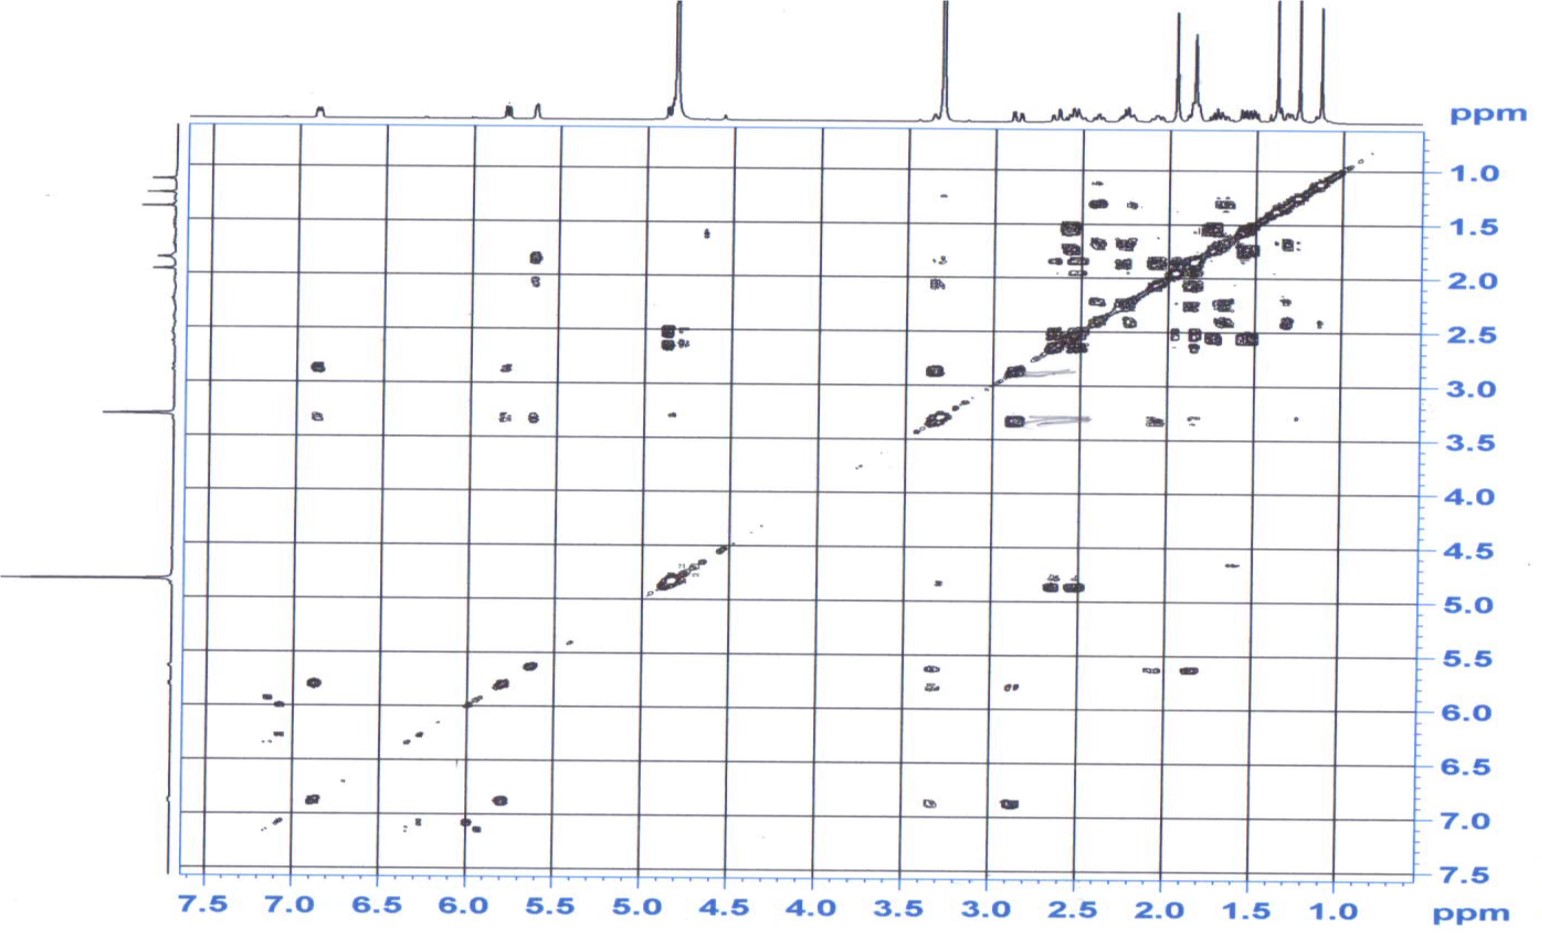


**Figure-S3**: Homonuclear COSY 45° spectrum of the isolated compound recorded in CD3OD at 500 MHz.


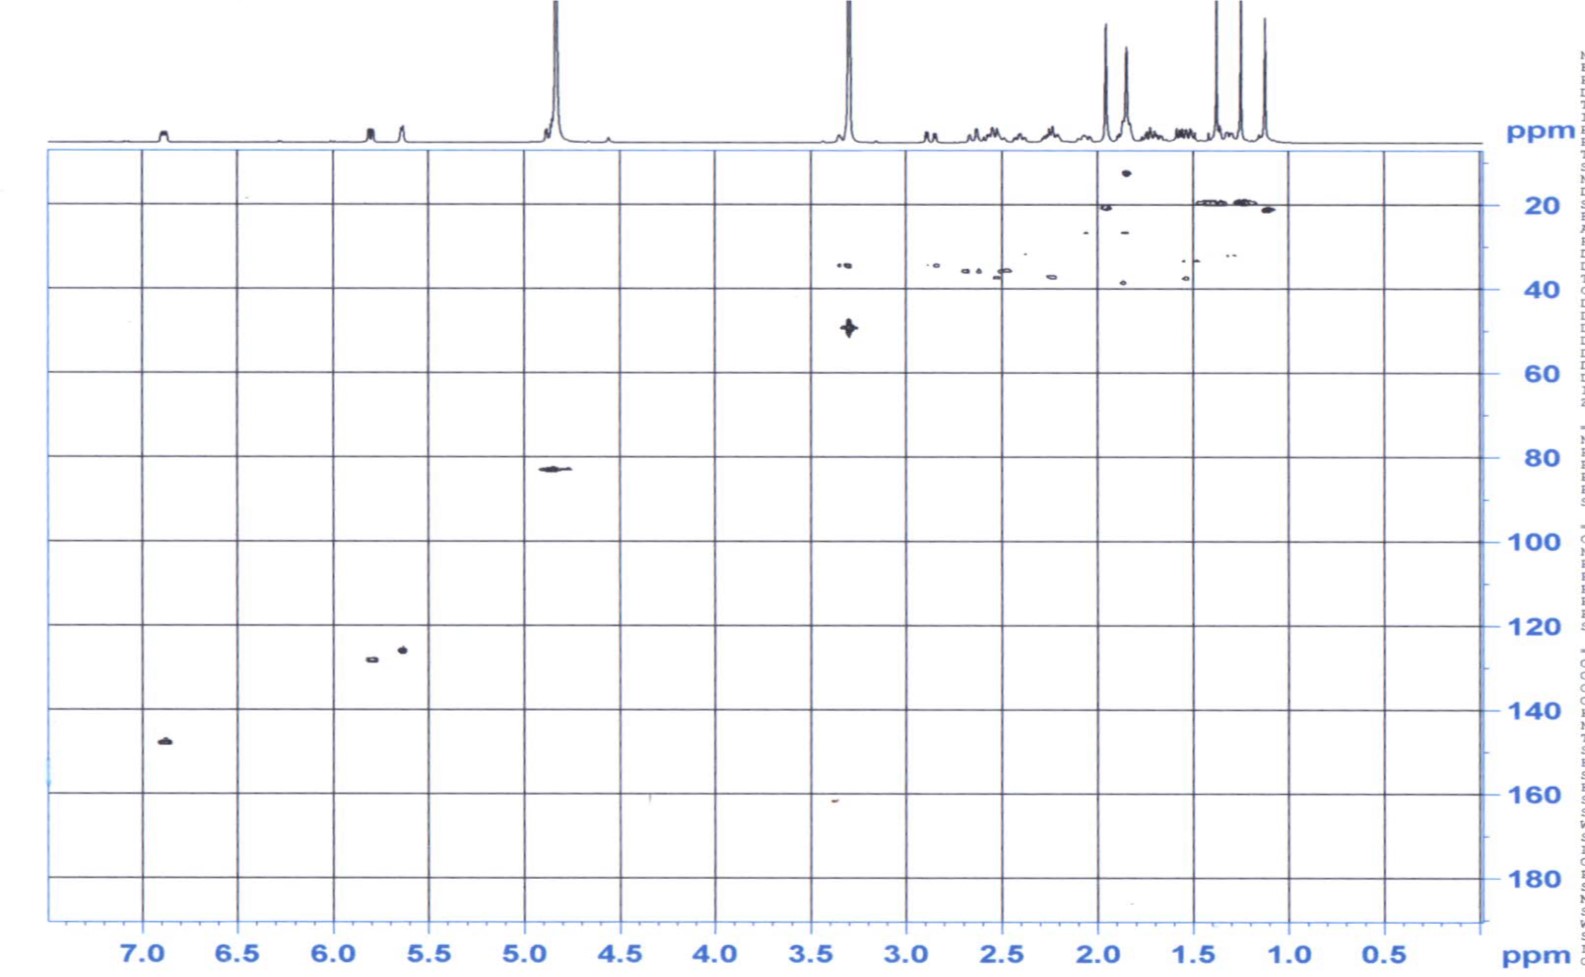


**Figure-S4**: HeteronuclearHSQC spectrum of the isolated compound recorded in CD3OD at 500 MHz.


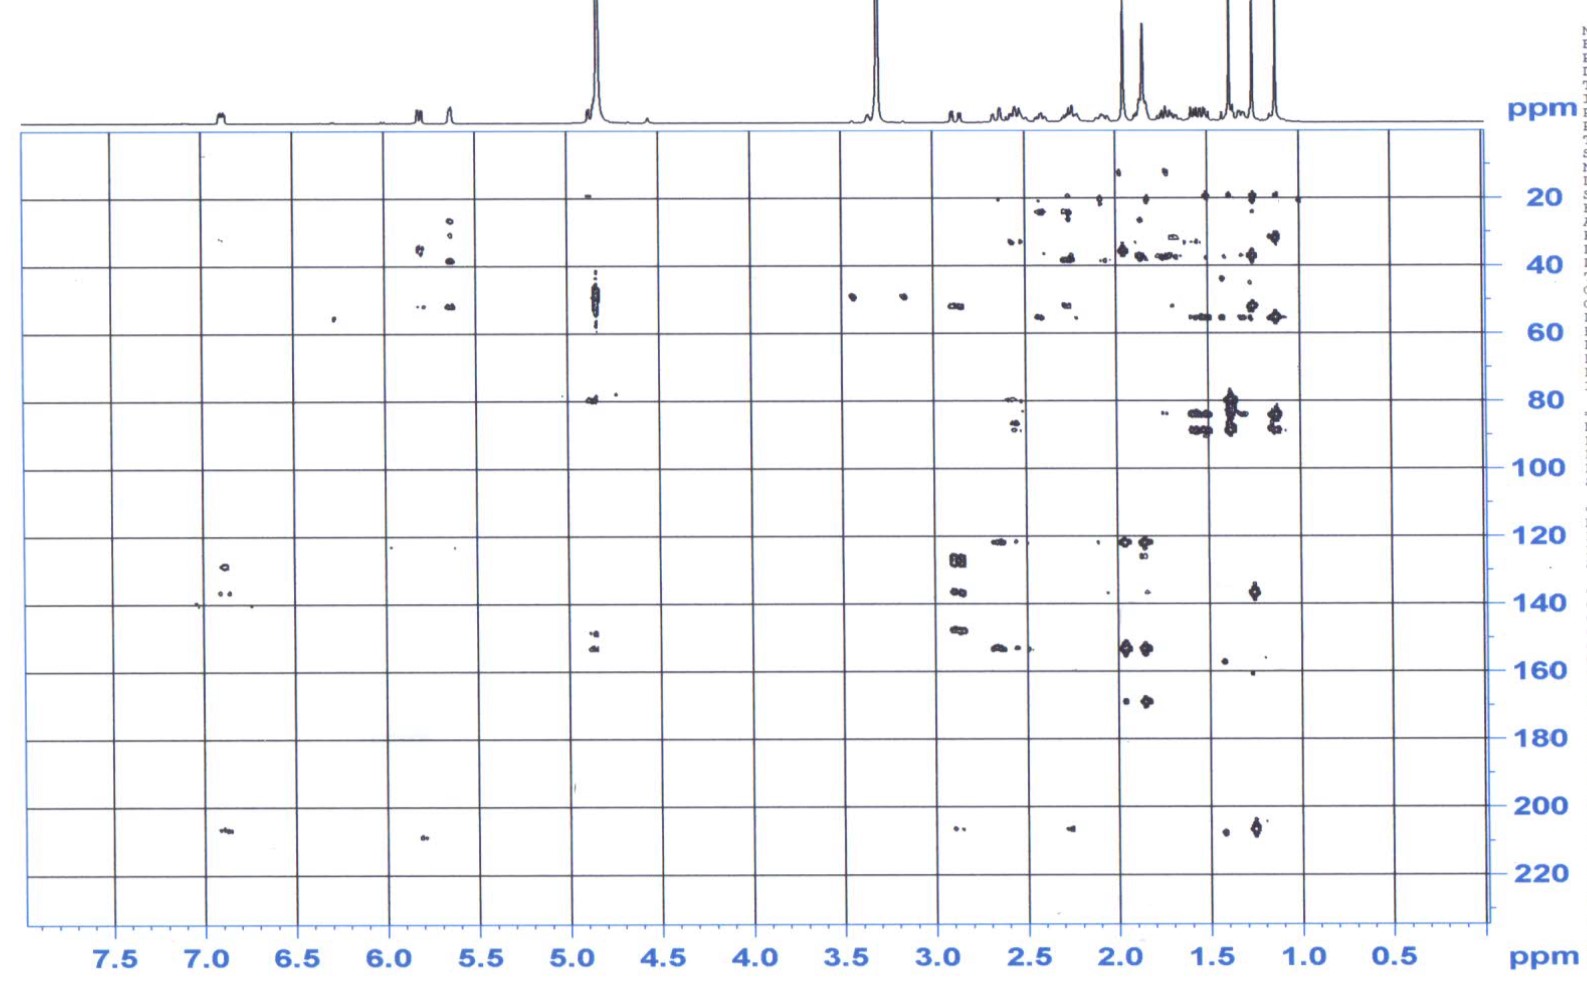


**Figure-S5**: Heteronuclear HMBC spectrum of the isolated compound recorded in CD3OD at 500 MHz.


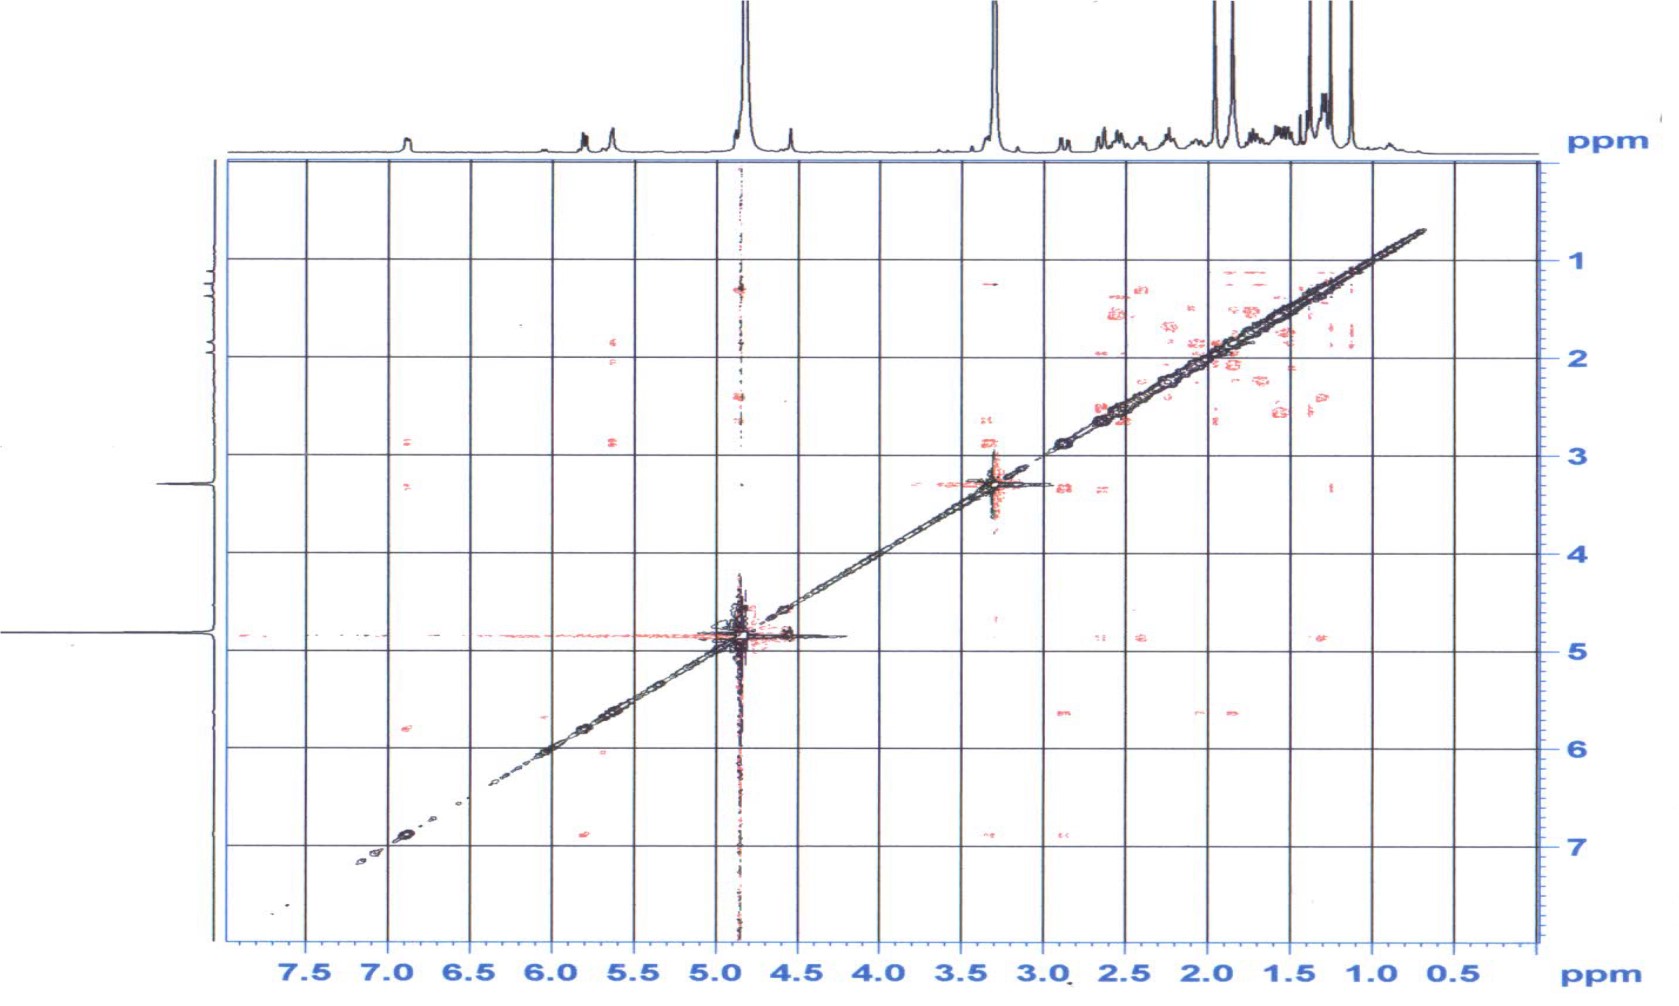


**Figure-S6**: Homonuclear NOSY spectrum of the isolated compound recorded in CD3OD at 500 MHz.
